# Supplementary material for: Differential impact of tamoxifen and aromatase inhibitors on thrombin generation: the prospective HEMOBREAST cohort
Source: PubMed Central journal article supplement — Blood Adv. 2022 May 6;6(9):2884–92. doi: 10.1182/bloodadvances.2021006623 (PMC9092409; doi:10.1182/bloodadvances.2021006623), 2022-05-06
Supplement: advancesADV2021006623-suppl1.pdf [file advancesADV2021006623-suppl1.pdf]

**Differential impact of tamoxifen and aromatase inhibitors on  
thrombin generation: the prospective HEMOBREAST cohort**

*SUPPLEMENTAL DATA*

---

Marc Blondon<sup>1</sup>, Alexandre Bodmer<sup>2</sup>, Laure Thouvenin<sup>2</sup>, Thomas Lecompte<sup>1</sup>, Marc Righini<sup>1</sup>, Pierre Fontana<sup>1</sup>, Alessandro Casini<sup>1</sup>

Affiliations: <sup>1</sup> Division of Angiology and Hemostasis; <sup>2</sup> Department of Oncology, Geneva University Hospitals and Faculty of Medicine, Geneva, Switzerland.

Supplementary Table 1. Change in other measurements of thrombin generation, with and without activated protein C or thrombomodulin, stratified by use of tamoxifen and aromatase inhibitors, and adjusted differences in change of these measures between the groups

|                       | Tamoxifen (n=42) |                |                             |         | Aromatase inhibitors (n=65) |               |                             |         | Difference between tamoxifen and aromatase inhibitor |         |
|-----------------------|------------------|----------------|-----------------------------|---------|-----------------------------|---------------|-----------------------------|---------|------------------------------------------------------|---------|
|                       | T1 mean (SD)     | T2 mean (SD)   | Absolute difference (95%CI) | P value | T1 mean (SD)                | T2 mean (SD)  | Absolute difference (95%CI) | P value | Adjusted absolute difference * (95%CI)               | P-value |
| Lag time [min]        | 3.4 (0.7)        | 3.0 (0.5)      | -0.4 (-0.5 to -0.3)         | <0.001  | 3.8 (0.8)                   | 3.9 (0.7)     | 0.0 (-0.1 to 0.1)           | 0.76    | -0.5 (-0.7 to -0.3)                                  | <0.001  |
| Time to peak [min]    | 7.3 (1.3)        | 6.5 (1.0)      | -0.8 (-1.0 to -0.6)         | <0.001  | 8.2 (1.3)                   | 8.1 (1.3)     | -0.1 (-0.2 to 0.1)          | 0.45    | -1.0 (-1.3 to -0.7)                                  | <0.001  |
| ETP with APC [nMxmin] | 933.1 (306.9)    | 1087.3 (270.4) | +154.2 (+103.2 to +205.2)   | <0.001  | 820.8 (203.1)               | 852.1 (282.2) | +31.4 (-19.0 to 81.7)       | 0.22    | +180.2 (+94.9 to +265.5)                             | <0.001  |

|                            |                  |                  |                              |            |                  |                  |                           |     |                              |        |
|----------------------------|------------------|------------------|------------------------------|------------|------------------|------------------|---------------------------|-----|------------------------------|--------|
| ETP with<br>TM<br>[nMxmin] | 589.9<br>(283.5) | 813.6<br>(304.6) | +223.7 (+165.2<br>to +282.3) | <0.00<br>1 | 406.1<br>(215.6) | 431.8<br>(211.1) | +25.7 (-14.2 to<br>+65.6) | 0.2 | +229.9 (+149.1 to<br>+310.7) | <0.001 |
|----------------------------|------------------|------------------|------------------------------|------------|------------------|------------------|---------------------------|-----|------------------------------|--------|

\*Adjusted for age, BMI, current smoking and baseline value at T1

APC = activated protein C ; ETP = endogenous thrombin potential ; TM = thrombomodulin ; SD = standard deviation
